# Supplementary material
Source: PubMed Central journal article supplement (PMC7677245)
Supplement: mmc1.pdf [file mmc1.pdf]

**Biophysical Journal, Volume 119**

**Supplemental Information**

**Applicability of Styrene-Maleic Acid Copolymer for Two Microbial Rhodopsins, RxR and *HsSRI***

**Tetsuya Ueta, Keiichi Kojima, Tomoya Hino, Mikihiro Shibata, Shingo Nagano, and Yuki Sudo**

**Supplementary Fig. S1**

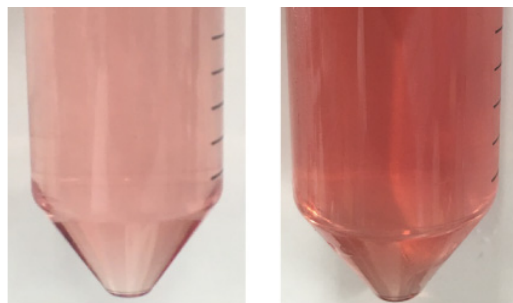

**2.5 w/v % SMA    5 w/v % SMA**

**Solubilization of *E. coli* cell membranes producing RxR with 2.5 w/v % and 5 w/v % SMA**  
Supernatant and precipitation after the ultracentrifugation of the suspension of the membranes solubilized with 2.5 w/v % SMA (left panel) or 5 w/v % SMA (right panel).

Supplementary Fig. S2

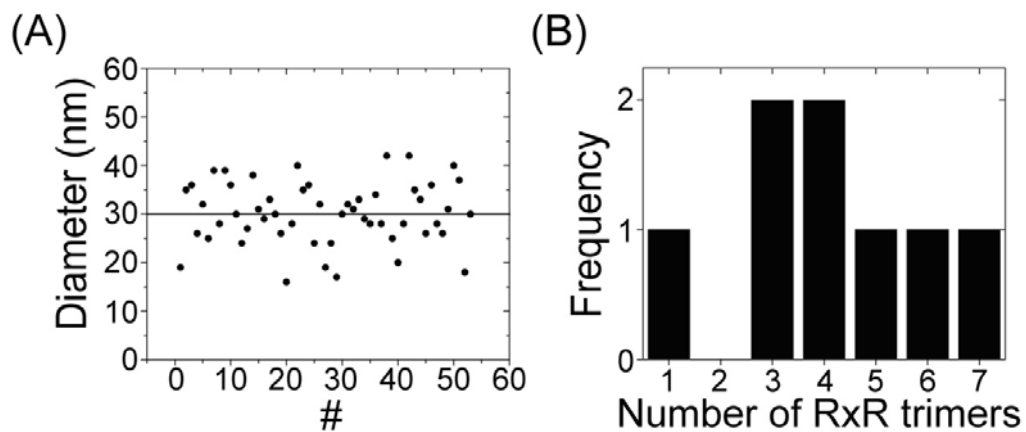

**Estimation of the diameters of each RxR-SMA particle and the number of RxR trimers per particle**

(A) Diameters of each RxR-SMA particle estimated from the AFM images ( $n = 53$ ). (B) Frequency of the number of RxR trimers per particle estimated from the AFM images ( $n = 8$ ).

**Supplementary Fig. S3**

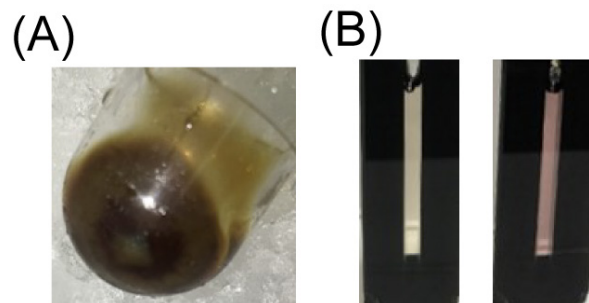

**Extraction of *HsSRI* from *E. coli* membranes by DDM and by SMA**

(A) *E. coli* cell membranes producing *HsSRI*. (B) Sample cuvettes of extracted *HsSRI* using DDM (*HsSRI*-DDM) (left panel) and SMA (*HsSRI*-SMA) (right panel) in buffer (500 mM NaCl, 50 mM Tris-HCl (pH 8.5), 10 v/v % glycerol).

**Supplementary movie S1**

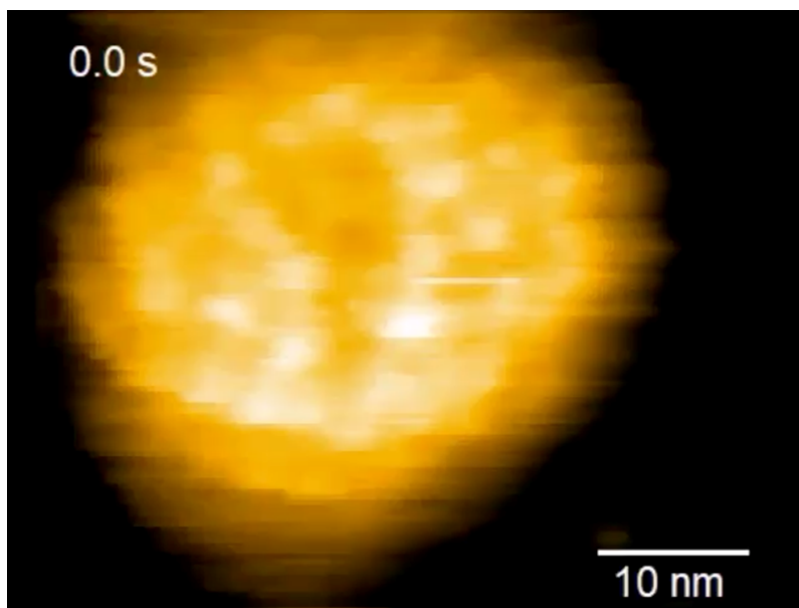

**A representative HS-AFM movie of RxR-SMA**

HS-AFM movie of RxR-SMA on the mica surface with 3.3 fps.
