# Supplementary material
Source: PubMed Central journal article supplement (PMC7677245)
Supplement: mmc3.pdf [file mmc3.pdf]

# Applicability of Styrene-Maleic Acid Copolymer for Two Microbial Rhodopsins, RxR and HsSRI

Tetsuya Ueta,<sup>1</sup> Keiichi Kojima,<sup>1</sup> Tomoya Hino,<sup>2,3</sup> Mikihiro Shibata,<sup>4</sup> Shingo Nagano,<sup>2,3</sup> and Yuki Sudo<sup>1,\*</sup>

<sup>1</sup>Dentistry and Pharmaceutical Sciences, Graduate School of Medicine, Okayama University, Okayama, Japan; <sup>2</sup>Department of Chemistry and Biotechnology, Graduate School of Engineering and <sup>3</sup>Center for Research on Green Sustainable Chemistry, Tottori University, Tottori, Japan; and <sup>4</sup>Nano Life Science Institute (WPI-NanoLSI), and High-Speed AFM for Biological Application Unit, Institute for Frontier Science Initiative, Kanazawa University, Kakuma, Kanazawa, Japan

**ABSTRACT** The membrane-embedded protein rhodopsin is widely produced in organisms as a photoreceptor showing a variety of light-dependent biological functions. To investigate its molecular features, rhodopsin is often extracted from cellular membrane lipids by a suitable detergent as “micelles.” The extracted protein is purified by column chromatography and then is often reconstituted into “liposomes” by removal of the detergent. The styrene-maleic acid (“SMA”) copolymer spontaneously forms nanostructures containing lipids without detergent. In this study, we applied SMA to characterize two microbial rhodopsins, a thermally stable rhodopsin, *Rubrobacter xylanophilus* rhodopsin (RxR), and an unstable one, *Halobacterium salinarum* sensory rhodopsin I (HsSRI), and evaluated their physicochemical properties in SMA lipid particles compared with rhodopsins in micelles and in liposomes. Those two rhodopsins were produced in *Escherichia coli* cells and were successfully extracted from the membrane by the addition of SMA (5 w/v %) without losing their visible color. Analysis by dynamic light scattering revealed that RxR in SMA lipid particles (RxR-SMA) formed a discoidal structure with a diameter of 54 nm, which was 10 times smaller than RxR in phosphatidylcholine liposomes. The small particle size of RxR-SMA allowed us to obtain scattering-less visible spectra with a high signal-to-noise ratio similar to RxR in detergent micelles composed of *n*-dodecyl- $\beta$ -D-maltoside. High-speed atomic force microscopy revealed that a single particle contained an average of 4.1 trimers of RxR (12.3 monomers). In addition, RxR-SMA showed a fast cyclic photoreaction ( $k = 13 \text{ s}^{-1}$ ) comparable with RxR in phosphatidylcholine liposomes ( $17 \text{ s}^{-1}$ ) but not to RxR in detergent micelles composed of *n*-dodecyl- $\beta$ -D-maltoside ( $0.59 \text{ s}^{-1}$ ). By taking advantage of SMA, we determined the dissociation constant ( $K_d$ ) of chloride for HsSRI as 34 mM. From these results, we conclude that SMA is a useful molecule forming a membrane-mimicking assembly for microbial rhodopsins having the advantages of detergents and liposomes.

**SIGNIFICANCE** Membrane-embedded proteins play essential roles in a variety of biological phenomena in organisms. To investigate their structures and functions, membrane proteins are usually extracted from cellular membrane lipids by a suitable detergent as micelles, after which the extracted proteins are reconstituted into liposomes. Styrene-maleic acid (SMA) copolymer, which spontaneously forms nanostructures containing cellular membrane lipids without detergent, was used to characterize two microbial rhodopsins, *Rubrobacter xylanophilus* rhodopsin and *Halobacterium salinarum* sensory rhodopsin I. Of note, those two microbial rhodopsins were successfully extracted using SMA keeping the advantages of the detergents and liposomes. We conclude that SMA is a useful molecule forming a membrane-mimicking assembly for microbial rhodopsins.

## INTRODUCTION

Membrane-embedded proteins are localized in cell membranes and play essential roles in a variety of biological functions, such as mass transfer and signal transduction across those membranes (1,2). Microbial rhodopsins are

proteins containing seven-transmembrane  $\alpha$ -helices with a chromophore retinal (vitamin A aldehyde) and form one of the largest phylogenetic groups among the membrane proteins (Fig. 1 A; (3)). The retinal is bound to an absolutely conserved Lys residue of the protein moiety (opsin) via a protonated retinylidene Schiff base linkage (Fig. 1 A). By differences in the interaction modes between the cognate opsin and the retinal, microbial rhodopsins absorb a wide range of visible wavelengths from 400 to 700 nm (3). In general, the light absorption of microbial rhodopsins causes the

Submitted May 28, 2020, and accepted for publication September 21, 2020.

\*Correspondence: [sudo@okayama-u.ac.jp](mailto:sudo@okayama-u.ac.jp)

Editor: Charles Deber.

<https://doi.org/10.1016/j.bpj.2020.09.026>

© 2020 Biophysical Society.

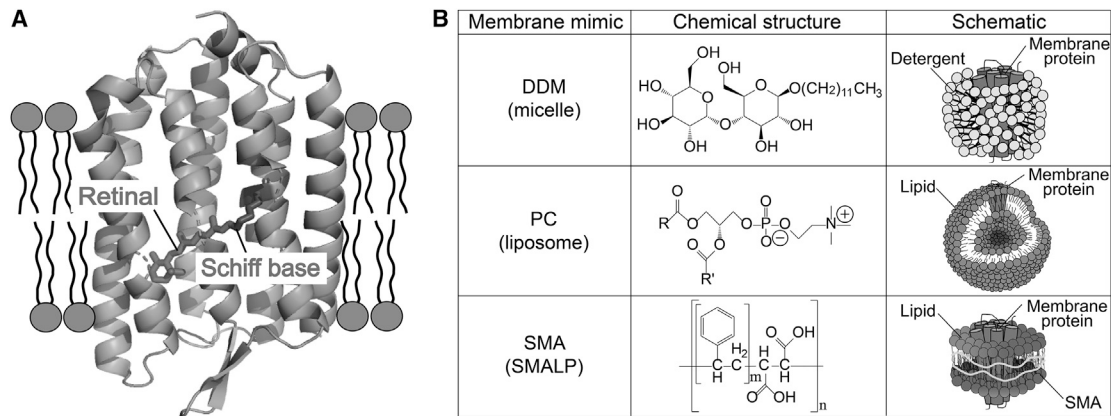

**FIGURE 1** Crystal structure of RxR and three membrane-mimicking systems. (A) Shown is the crystal structure of RxR (Protein Data Bank, PDB: 6KFQ (42)). The chromophore retinal binds to the seven-transmembrane domain via a protonated Schiff base linkage. (B) Shown are chemical structures and schematics of three membrane-mimicking systems. The characters *m* and *n* in the chemical structure of SMA represent the repeated numbers *m*, which correspond to 2 and ~10 in this study. The number *n* was estimated from the molecular weight of styrene-maleic anhydride (SMAnH).

*all-trans* to 13-*cis* photoisomerization of the retinal (3), after which it returns to the original state through various spectroscopically distinctive photointermediates, such as K, L, M, N, and O (3,4). During a cyclic series of reactions called the photocycle, microbial rhodopsins show various light-dependent biological functions, such as photoelectric sensors, ion transporters, and enzymes within organisms (3,5). Thus, we can precisely control the function of microbial rhodopsins by visible light and can monitor the formation and decay of each intermediate with a high spatiotemporal resolution. It is worth noting that microbial rhodopsins are distributed in a variety of microorganisms, including three biological domains (i.e., eukaryotes, bacteria, and archaea) and viruses (5–7), indicating their biological significance in the host organisms and viruses. In addition, microbial rhodopsins are applicable for optogenetics technology, a method to control biological activity with light-activatable and genetically encoded molecules such as microbial rhodopsins and other photoreactive proteins (7,8). These features make microbial rhodopsins a valuable model both for membrane proteins and for photoactive proteins (6).

To investigate the molecular properties of microbial rhodopsins, they are often extracted from cellular membrane lipids by a suitable detergent as “micelles,” in which microbial rhodopsins are surrounded by amphipathic detergent molecules. The micelle system enables protein purification and makes it possible to perform biochemical, biophysical, and spectroscopic studies with the suppression of the scattering of the samples. Many microbial rhodopsins have been successfully solubilized by a class of detergents composed of a hydrophilic saccharide and a hydrophobic alkyl chain, such as *n*-dodecyl- $\beta$ -D-maltoside (DDM) and *n*-octyl- $\beta$ -D-glucoside, without losing their visible color (Fig. 1 B, upper panel; (9–11)). However, it is difficult to apply the detergent system to some unstable rhodopsins.

In addition, because microbial rhodopsins function naturally in cell membranes, it is often difficult to investigate their biological activities in detergent micelles. In fact, it has been reported that the functional properties of several membrane proteins in micelles are significantly different from those in lipid bilayers (12). Therefore, detergent-solubilized rhodopsin is often reconstituted into “liposomes” by removal of the detergent and the addition of lipid molecules (13–15). Many microbial rhodopsins have been successfully reconstituted into a class of phospholipids such as phosphatidylcholine (PC) and phosphatidylglycerol (PG) without loss of their visible color (Fig. 1 B, middle panel; (14,15)). In general, the reconstitution of rhodopsins into liposomes has been performed in solutions with low salt concentrations ( $\leq 500$  mM NaCl) because charges of the salt hamper the formation of liposomes because of the electric repulsion between salts and lipids. It should be noted that some microbial rhodopsins, especially those obtained from hyperhalophilic organisms such as *Halobacterium salinarum* sensory rhodopsin I (HsSRI), rapidly lose their visible absorption in low salt conditions within several seconds because of denaturation (16). Therefore, such unstable rhodopsins are not suitable for reconstitution into liposomes. Besides, detergent-solubilized rhodopsin is reconstituted into nanoscale phospholipid bilayers surrounded by amphipathic membrane scaffold protein(s) (MSP(s)), called MSP nanodiscs, by removing the detergent (17,18). Because it is necessary to solubilize and purify microbial rhodopsins in the detergent micelles before the reconstitution into the MSP nanodiscs, the rhodopsins that are unstable in the detergent micelles are not suitable for this system. Thus, in contrast to soluble proteins, membrane proteins face several problems for characterizing their molecular properties especially *in vitro*.

Styrene-maleic acid (SMA) copolymer spontaneously converts membranes into water-soluble nanodiscs (Fig. 1 B,

lower panel). When mixed with cellular membranes, the styrene moieties of SMA spontaneously bind to the lipid acyl chain by hydrophobic interactions, leading to the formation of nanostructures called SMA lipid particles (SMALPs) (Fig. 1 B, lower panel; (19)). These characteristics make SMA a useful membrane mimic for solubilizing membrane proteins and for reconstituting them into lipid-based nanodiscs (20). Thus, by using SMA, membrane-embedded proteins can be extracted from the membrane and reconstituted into SMALPs without the use of detergents and extrinsic lipids (21). In fact, SMA has been successfully applied to various types of membrane proteins, including potassium channels (22), ATP-binding cassette (ABC) transporters (23), G-protein-coupled receptors (24), cytochrome  $b_6f$  complex (25), and photosystem II complex (25), which were produced in various hosts such as bacteria, yeast, insect cells, and mammalian cells.

On the basis of that background, in this study, we used SMA with two microbial rhodopsins, a thermally stable rhodopsin, *Rubrobacter xylanophilus* rhodopsin (RxR) (11,26), and an unstable one, *Halobacterium salinarum* sensory rhodopsin I (*HsSRI*) (27), and quantitatively investigated their physicochemical properties in SMA and compared those with DDM micelles and PC liposomes. RxR is produced in the eubacterium *R. xylanophilus*, which lives in high temperatures ( $\sim 60^\circ\text{C}$ ) as a light-driven outward proton pump (11,26). The proton gradient generated across the membrane is thought to be utilized for the production of ATP through ATP synthase. *HsSRI* is produced in the hypersaline archaeon *H. salinarum*, which lives in extremely high salt environments (i.e., 4 M NaCl). *HsSRI* functions as a dual photosensor both for negative and for positive phototaxis (28). Of note, *HsSRI* is unstable, especially in the detergent-solubilized state at low salt conditions ( $\leq 500$  mM NaCl) (29). In this study, we used RxR and *HsSRI* to evaluate the applicability of SMA forming a membrane-mimicking assembly for microbial rhodopsins. Previous studies have applied SMA so far to several microbial rhodopsins, such as *H. salinarum* bacteriorhodopsin, *Natronomonas pharaonis* sensory rhodopsin II (*NpSRII*), and proteorhodopsin (30–33). We will fully discuss the results and applicability of SMA estimated in this study in comparison with the previous studies.

## MATERIALS AND METHODS

### Sample preparation

For the preparation of SMA, a styrene-maleic anhydride (SMAnH) copolymer (SMA2000, in which the ratio of styrene and maleic anhydride is  $\sim 2:1$ ; Cray Valley, Exton, PA) was kindly provided by Kawahara Petrochemical (Osaka, Japan). The copolymer has been widely used to characterize several membrane proteins in the previous studies (19,33). The number average molecular weight, weight average molecular weight, and polydispersity index were 3000, 7500, and 2.5, respectively. We converted the hydrophobic SMAnH into the water-soluble, amphiphilic, membrane-active acid derivative SMA in a hydrolysis reaction according to a previously published method (34). In short, SMAnH was solubilized in 1 M

NaOH and refluxed for 2 h while heating the suspension to  $100^\circ\text{C}$ . After being cooled to room temperature, the polymer was precipitated by adding HCl and washed six times with deionized water to remove  $\text{Na}^+$  ions. The sample was dissolved in 0.6 M NaOH and adjusted to pH 8 to prepare the stock solutions. The solutions were lyophilized and then stored at  $-20^\circ\text{C}$  until the use.

For DNA manipulation and the production of RxR and *HsSRI*, the *Escherichia coli* strains, DH5 $\alpha$  and BL21(DE3), were used as hosts, respectively. Those expression plasmids encoded a hexahistidine motif (His-tag) at the C-terminus as described previously (26,29). *E. coli* cells harboring the expression plasmids were incubated in 50 mL LB medium containing 50  $\mu\text{g}/\text{mL}$  ampicillin and were grown at  $37^\circ\text{C}$  for 15 h. After the preculture, the growth medium was directly transferred to 1.0 L LB medium containing 50  $\mu\text{g}/\text{mL}$  ampicillin, and the cells were grown at  $37^\circ\text{C}$  until the optical density at 660 nm reached 1.4–1.6. Isopropyl-D-1-thiogalactopyranoside (final concentration = 1 mM) and all-*trans* retinal (final concentration = 10  $\mu\text{M}$ ) were then added to the culture medium and were further incubated at  $37^\circ\text{C}$  for 3 h to induce protein production, after which the cells were collected by centrifugation ( $5535 \times g$  for 10 min at  $4^\circ\text{C}$ ). The crude membranes of rhodopsin-producing cells were solubilized with a detergent 1 w/v % DDM (RxR, for 45 min at room temperature; *HsSRI*, for 30 min at  $4^\circ\text{C}$ ) (Dojindo, Kumamoto, Japan) or with 2.5 and 5 w/v % SMA (RxR, for 2 h at room temperature; *HsSRI*, for 2 h at  $4^\circ\text{C}$ ) (20,23,24,32,33,35,36). The suspension of the membranes was centrifuged ( $103,900 \times g$  for 30 min at  $4^\circ\text{C}$ ) and then the supernatant was collected as the solubilized fraction. The red color of the supernatant extracted with 5 w/v % SMA was brighter than that with 2.5 w/v % SMA (Fig. S1), which indicates that the rhodopsins were more efficiently extracted from the membrane with 5 w/v % SMA. The solubilized fraction was purified by  $\text{Ni}^{2+}$  affinity column chromatography utilizing the His-tag attached to RxR and *HsSRI*. The purified proteins were concentrated and replaced with the appropriate buffer solution by centrifugation using an Amicon Ultra Filter at  $4^\circ\text{C}$ . The yield of the purified RxR was  $\sim 5$  mg per 1 L culture medium for 5 w/v % SMA, which was 2.5-fold higher than that (i.e.,  $\sim 2$  mg per 1 L culture medium) for 2.5 w/v % SMA. Therefore, we decided to use 5 w/v % SMA for extracting a large amount of the samples to be used in their detailed analysis in SMALPs. The RxR purified by DDM was reconstituted into egg PC liposomes (Sigma-Aldrich, Tokyo, Japan), from which DDM was removed with Bio-Beads SM-2 (Bio-Rad Laboratories, Hercules, CA). The molar ratio of RxR and PC was adjusted to 1:30. The PC-reconstituted RxR was collected by centrifugation ( $20,631 \times g$  for 20 min at  $4^\circ\text{C}$ ) and was washed several times with buffer containing 50 mM Tris-HCl (pH 8), 150 mM NaCl, and 10 v/v % glycerol. The samples were then resuspended in the same buffer for the measurements.

### Dynamic light scattering and high-speed atomic force microscopy experiments

Dynamic light scattering (DLS) signals were recorded using a Zetasizer uV (Malvern Panalytical, Worcestershire, UK) in a buffer solution containing 50 mM Tris-HCl (pH 8), 150 mM NaCl, and 10 v/v % glycerol at room temperature ( $\sim 25^\circ\text{C}$ ). The particle diameters were calculated by the Einstein Stokes equation as follows (Eq. 1):

$$D = \frac{k_B \times T}{6\pi \times \eta_0 \times a}, \quad (1)$$

where  $k_B$ ,  $T$ ,  $\eta_0$ , and  $a$  represent Boltzmann's constant, absolute temperature, dynamic viscosity, and the radius of the discoidal particle, respectively.

High-speed atomic force microscopy (HS-AFM) images of RxR in SMALPs (RxR-SMA) were obtained as described previously (37,38). Briefly, HS-AFM was operated in the tapping mode. Deflections of the cantilever were detected with an optical beam deflection detector using

an infrared laser (0.8 mW, 780 nm) focused through a  $\times 60$  objective lens (CFI S Plan Fluor ELWD 60 $\times$ ; Nikon, Tokyo, Japan) onto the back side of a cantilever (BL-AC7DS-KU4; Olympus, Tokyo, Japan) covered with a gold film, and the reflected infrared laser was detected by a two-segmented p-intrinsic-n (PIN) photodiode. The free oscillation amplitude was  $\sim 1$  nm, and the set-point amplitude was  $\sim 90\%$  of the free amplitude for feedback control of the HS-AFM. An amorphous carbon tip generated by electron beam deposition was used as an atomic force microscopy (AFM) probe. The experiments were performed on a mica substrate in a buffer solution of 20 mM Tris-HCl (pH 7.4) and 150 mM KCl at room temperature ( $\sim 25^\circ\text{C}$ ).

### Ultraviolet visible spectra, high-performance liquid chromatography, and time-resolved flash-photolysis experiments

Ultraviolet (UV) visible spectra were recorded using a UV-2450 spectrophotometer (Shimadzu, Kyoto, Japan) at  $25^\circ\text{C}$  in the appropriate buffer solution. The retinal composition was analyzed by high-performance liquid chromatography (HPLC) as reported previously (39). In short, the protein concentration was adjusted to  $5.6 \mu\text{M}$ , and then the retinal was extracted with hexane as retinal oxime by the addition of 1 M hydroxylamine (final concentration = 100 mM) with 99.7 v/v % methanol (final concentration = 66.7 v/v %) at room temperature ( $\sim 25^\circ\text{C}$ ). The extraction was carefully carried out under dim red light ( $>580$  nm) to avoid the photoactivation of the proteins. Each sample was kept in the dark for more than 1 week before analysis. The molar composition of each retinal isomer was calculated from the areas of the peaks in HPLC patterns monitored at 360 nm. Upon calculation, the reported absorption coefficients of retinal isomers were used ( $51,600$ ,  $54,600$ , and  $47,900 \text{ cm}^{-1} \text{ M}^{-1}$  for all-*trans* 15-*anti*, all-*trans* 15-*syn*, and 13-*cis* retinal oximes, respectively) (40). The pH titration experiments were performed using essentially the same method described previously (39). In short, the experiments were performed at room temperature using RxR reconstituted into PC liposomes and solubilized by DDM and SMA in a solution containing 150 mM NaCl and Good's buffer (0.89 mM citric acid, 0.89 mM MES, 1.1 mM TES, 0.78 mM TAPS, 1.1 mM CHES, and 0.33 mM CAPS) with 0.05% DDM. The buffer composition had the same buffer capacity over a wide range of pH-values. The pH was then adjusted to the desired value by the addition of NaOH. The data were fitted to the Henderson-Hasselbalch equation with single  $\text{pK}_a$  as follows (Eq. 2):

$$\Delta Abs = \frac{a}{1 + 10^{(\text{pH} - \text{pK}_a)}} + b, \quad (2)$$

where  $a$  represents the amplitude of the change of absorption differences, and  $b$  is an offset. After the measurements, the reversibility of the pH changes of the sample was checked to confirm that the sample was not denatured during the measurements.

The  $\text{Cl}^-$  titration experiments were performed using essentially the same method described previously (41). In short, the experiments were performed on ice using *HsSRI* solubilized by SMA in a buffer containing 50 mM Tris- $\text{H}_2\text{SO}_4$  (pH 8.5) and 10 v/v % glycerol. The chloride ( $\text{Cl}^-$ ) ions were supplied and adjusted to the desired value using a concentrated NaCl solution in which the following two buffers were used in the appropriate ratio to maintain the ionic strength: 1) 4 M NaCl, 50 mM Tris- $\text{H}_2\text{SO}_4$  (pH 8.5), and 10 v/v % glycerol; and 2) 1 M  $\text{Na}_2\text{SO}_4$ , 50 mM Tris- $\text{H}_2\text{SO}_4$  (pH 8.5), and 10 v/v % glycerol. The NaCl-induced absorbance changes of *HsSRI* were plotted against the NaCl concentration and were analyzed by fitting the data of the Hill equation as follows (Eq. 3):

$$\Delta A = \frac{\Delta A_{\text{max}} \times [X]^n}{K_d + [X]^n}, \quad (3)$$

where  $\Delta A_{\text{max}}$  represents the maximal absorbance change, and  $[X]$  is the NaCl concentration. The Hill coefficient was fixed as 1.

The apparatus and the procedure for time-resolved laser flash photolysis were essentially the same as described previously (39). In short, absorption spectra from 380 to 700 nm at 5-nm intervals were obtained using a homemade computer-controlled flash-photolysis system equipped with an Nd:YAG laser as an actinic light source. The wavelength of the actinic pulse was tuned at 545 nm (4 ns) using an optical parametric oscillator (Surelite OPO Plus; Continuum, San Jose, CA). The pulse intensity was adjusted to 2 mJ/pulse. The data before the laser flash were adopted as a baseline. All measurements were conducted at  $25^\circ\text{C}$  using a thermostat. The data were analyzed by fitting the data of the multiexponential equation with the linear combination as follows (Eq. 4):

$$F(x) = A_1 \exp\left(-\frac{x}{t_1}\right) + A_2 \exp\left(-\frac{x}{t_2}\right) + A_3 \exp\left(-\frac{x}{t_3}\right), \quad (4)$$

where  $t$  represents each time constant, and  $A$  represents the rate of each intermediate at each time constant. After the measurements, the reproducibility of the data was checked to confirm that the sample was not denatured during the measurements.

## RESULTS

Firstly, to investigate the applicability of SMA for RxR, we analyzed the particle structures of RxR-SMA and then quantitatively compared them with those of RxR in DDM micelles (RxR-DDM) and RxR in PC liposomes (RxR-PC). Fig. 2 A shows the DLS patterns of RxR-DDM, RxR-PC, and RxR-SMA in solution. The population of the samples was plotted against the cognate diameters. As seen, sharp peaks were observed at  $12 \pm 1.5$ ,  $54 \pm 6.9$ , and  $5.4 \times 10^2 \pm 23$  nm for RxR-DDM, RxR-SMA, and RxR-PC, respectively (Table 1). The particle size for RxR-SMA ( $54 \pm 6.9$  nm) was much smaller than visible wavelengths (400–800 nm), suggesting relatively scattering-less visible spectra. For RxR-PC, in addition to the main peak, a sub-peak was also observed at  $2.7 \times 10^3 \pm 2.2 \times 10^2$  nm. The areas of the peaks in Fig. 2 A reflect the population of the cognate particles. From the area of the signals, the ratio of small and large particles was estimated at 86 and 14%, respectively, indicating the heterogeneity of RxR-PC.

It has been reported that SMA forms a discoidal structure with a Stokes diameter of  $\sim 10$  nm (20,23,27), which is significantly smaller than RxR-SMA ( $54 \pm 6.9$  nm) observed here (Fig. 2 A). Several previous studies reported that the SMALPs formed multiple-layered particles by AFM and DLS measurements (31,36). The multiple-layered structure of the SMALPs could lead to the increased Stokes diameter observed in this study. To investigate the reason for that, we performed HS-AFM (Fig. 2, B–D). As seen in Fig. 2, B and C, discoidal particles with diameters of several tens of nanometers and heights of  $\sim 5$ , 10, and 15 nm were observed on a mica surface in which the size roughly matched well with RxR-SMA. The average diameter of the particles was estimated as  $30 \pm 6.4$  nm ( $n = 53$ )



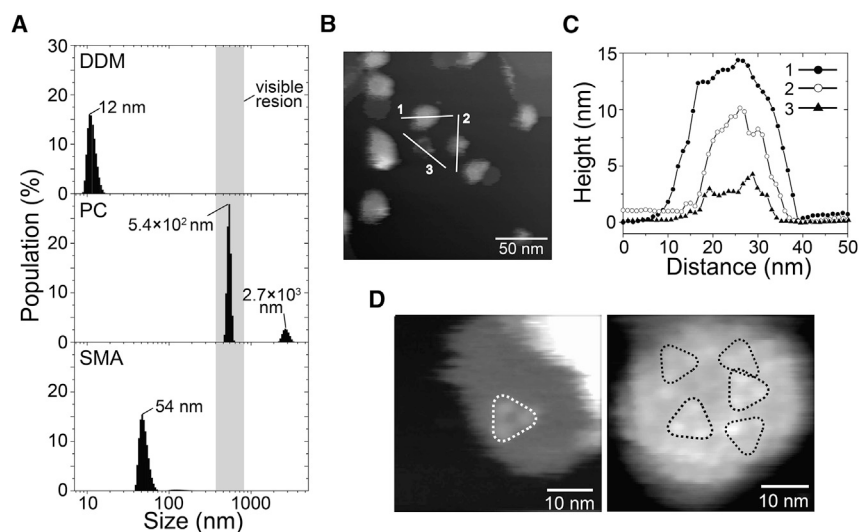

**FIGURE 2** Structural information revealed by DLS and HS-AFM. (A) Shown are the DLS patterns of RxR-DDM (upper panel), RxR-PC (middle panel), and RxR-SMA (lower panel) with averaged sample diameters. The integration of the areas of the peaks is 100% in each sample. The visible wavelength region (400–800 nm) is colored gray in the background. (B) Shown are the HS-AFM images of RxR-SMA on the mica surface. Scale bars, 50 nm. (C) The cross section profiles of the particles are shown in (B) as white lines 1, 2, and 3. (D) Shown are snapshots of the AFM video. Scale bars, 10 nm. The estimated RxR trimers are shown as black and white triangles.

(Fig. S2 A). The ratio of particles with heights of  $\sim 5$ , 10, and 15 nm was estimated as 40, 20, and 40%, respectively ( $n = 214$ ). Because the heights of particles with 5, 10, and 15 nm matched well with the single, double, and triple values of the thickness of a single lipid bilayer (i.e.,  $\sim 5$  nm), the RxR-SMA should have consisted of single-, double-, and triple-layered particles. The large diameter and multilayered structure of RxR-SMA would lead to the increased Stokes diameter in DLS measurements compared with the previously reported size (20,35). An expanded view of the AFM image of RxR-SMA and its video showed that RxR forms a trimer in the particle (Fig. 2 D; Video S1). We directly counted the numbers of RxR trimers from the AFM images ( $n = 8$ ) (Fig. S2 B) and estimated the average number of RxR trimers per particle as  $4.1 \pm 1.4$  (12.3 monomers). Because the average diameter of the particles was estimated as  $30 \pm 6.4$  nm, the average number of lipids contained in an empty particle with a diameter of 30 nm was estimated as 1125–1250 lipids, assuming that an empty particle with a diameter of 12 nm contains 180–200 lipids (35). The volume of 4.1 trimers of RxR corresponds to 492 lipids, assuming that the volume of crystal structure of monomeric RxR ( $\sim 37$  nm<sup>3</sup>) corresponds to 40 lipids (42). By subtracting 492 lipids from 1125 to  $\sim 1250$  lipids, we calculated the number of lipids as 635–760 in the particle with a diameter of 30 nm containing 4.1 trimers of RxR. Thus, the ratio of RxR molecules to lipids was estimated as 1:52–62 in this

study. In general, the diameter of the particle was around 10 nm, and the ratio of protein molecules to lipids was estimated as 1:10–170 (20,35). Although the particle diameter in this study was much larger than those of the typical particles, the ratio of protein molecules to lipids in this study was within the reported range of the ratio (i.e., 10–170).

Secondly, we analyzed the absorption spectra and retinal configurations of RxR-DDM, RxR-PC, and RxR-SMA (Fig. 3). In the visible region, an absorption maximum ( $\lambda_{\max}$ ) was commonly located at 540 nm for RxR-DDM, RxR-PC, and RxR-SMA, suggesting a less significant alteration in the protein structure by their membrane mimics (Fig. 3 A). These data demonstrated that we were able to purify RxR as a photoactive protein using SMA without a detergent. Fig. 3 B and Table 1 show the HPLC patterns of the retinal oxime extracted from the cognate samples. As shown in Fig. 3 B, the isomeric state of retinal is predominantly all-*trans* (>98.3%, the sum of the area of Ts and Ta), with a small proportion of 13-*cis* (<1.7%, the sum of the area of 13s and 13a). As well as other microbial rhodopsins, RxR shows a function (i.e., outward proton pumping activity) in collaboration only with the all-*trans* retinal chromophore but not with the 13-*cis* form. From these results, we concluded that SMA shows no significant structural change either in the protein or in the retinal.

Thirdly, we analyzed the  $pK_a$  of the protonated Schiff base of the retinal chromophore. For membrane-embedded

**TABLE 1** Comparison of the Physicochemical Properties of RxR-DDM, RxR-PC, and RxR-SMA

| Membrane Mimic | Particle Diameter (nm)                                                        | All- <i>Trans</i> Retinal (%) | $pK_a$ of the Schiff Base | Photocycling Rate (s <sup>-1</sup> ) |
|----------------|-------------------------------------------------------------------------------|-------------------------------|---------------------------|--------------------------------------|
| DDM (micelle)  | $12 \pm 1.5$                                                                  | 98.3                          | $10.4 \pm 0.021$          | 0.59                                 |
| PC (liposome)  | $5.4 \times 10^2 \pm 23$ (86%)<br>$2.7 \times 10^3 \pm 2.2 \times 10^2$ (14%) | 98.4                          | $11.7 \pm 0.049$          | 17                                   |
| SMA (SMALP)    | $54 \pm 6.9$                                                                  | 99.0                          | $12.2 \pm 0.10$           | 13                                   |

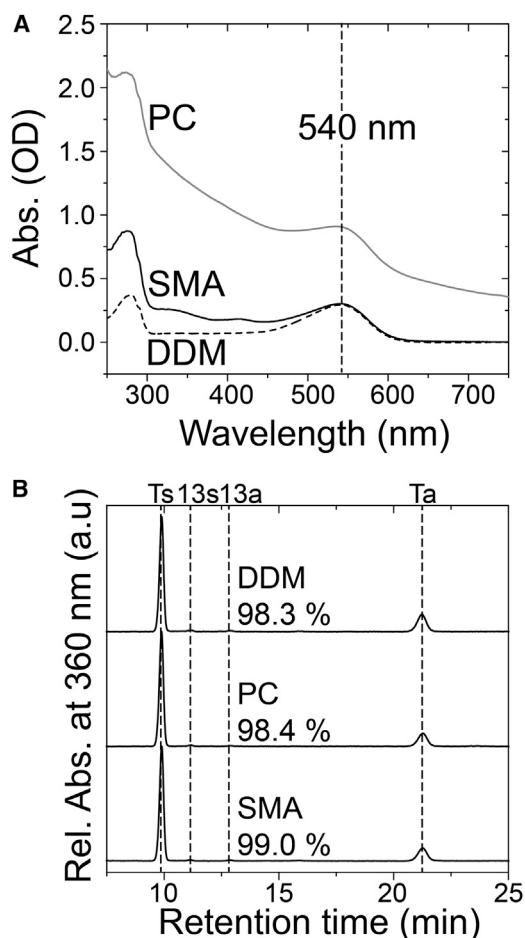

**FIGURE 3** Absorption spectra and HPLC patterns of RxR-DDM, RxR-PC, and RxR-SMA. (A) Shown are the UV-Vis spectra of RxR-DDM (broken line), RxR-PC (gray solid line), and RxR-SMA (black solid line). (B) Shown are the HPLC patterns of the retinal oxime of RxR-DDM, RxR-PC, and RxR-SMA in the dark ( $\sim 25^{\circ}\text{C}$ ). Ts, Ta, 13s, and 13a represent all-*trans*-15-*syn*, all-*trans*-15-*anti*, 13-*cis*-15-*syn*, and 13-*cis*-15-*anti* retinal oxime, respectively. The molar compositions of retinal isomers were calculated from the areas of the peaks in the HPLC patterns.

proteins, including microbial rhodopsins, charged residues such as Lys, Arg, Asp, and Glu play essential roles in protein functions (26). In particular, a Lys residue located in the seventh helix is absolutely conserved among microbial rhodopsins and forms a protonated Schiff base with the retinal aldehyde. It is known that the deprotonation of the Schiff base nitrogen under alkaline condition leads to an increase in the energy gap between the electronic ground and excited states and then a spectral blue shift from the visible region to the UV region (43). In general, other titratable groups are not seen in this region. We performed pH titration experiments to estimate the  $pK_a$ -value of the protonated Schiff base (Lys209 in RxR) by monitoring the spectral blue shift due to the deprotonation of the Schiff base at an alkaline pH. Fig. 4 shows the absorption changes of RxR-DDM (Fig. 4 A), RxR-PC (Fig. 4 B) and RxR-SMA (Fig. 4 C) at varying pH-values from 7.6 to 12.6. Decreases and increases in

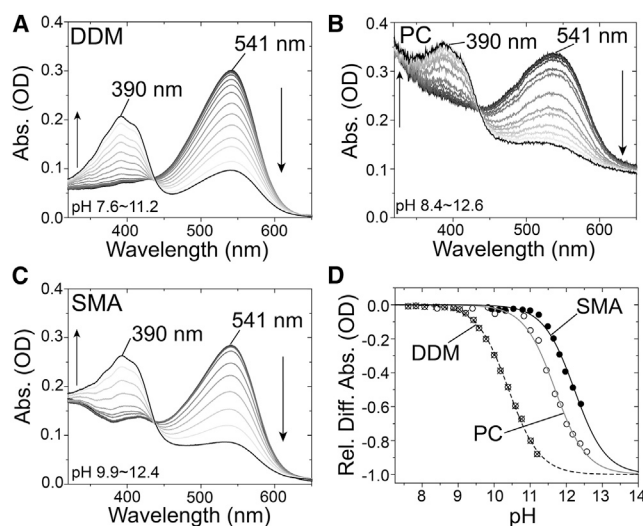

**FIGURE 4** pH titration experiments of RxR-DDM, RxR-PC, and RxR-SMA. (A–C) Shown are the absorption spectra of RxR-DDM (A), RxR-PC (B), and RxR-SMA (C) obtained at pH-values ranging from 7.6 to 12.6. The pH was adjusted to the desired values by the addition of NaOH. (D) Shown is the estimation of the  $pK_a$  of the Schiff base. Absorption changes at 541 nm were plotted against respective pH-values. The data were fitted by the Henderson-Hasselbalch equation (Eq. 2, see Materials and Methods).

absorption at 541 nm and 390 nm, respectively, were observed with an isosbestic point at around 436 nm, indicating the presence of an equilibrium between the protonated and deprotonated forms of the Schiff base in RxR without the protonated and deprotonated states of other titratable groups. When the absorption changes at 541 nm were plotted against the environmental pH, the titration curves were fitted well by the Henderson-Hasselbalch equation (see Eq. 2; Fig. 4 D). From these data, the  $pK_a$ -values of Lys209 of RxR-DDM, RxR-PC, and RxR-SMA were estimated to be  $10.4 \pm 0.021$ ,  $11.7 \pm 0.049$  and  $12.2 \pm 0.10$ , respectively.

Fourthly, we performed time-resolved flash-photolysis experiments to examine the photoreactions of RxR-DDM, RxR-PC, and RxR-SMA. Microbial rhodopsin shows a cyclic series of reactions (called the photocycle) upon illumination that returns to the original state through several intermediates having distinctive absorption maxima. During the photocycle, cognate rhodopsin function is achieved. Therefore, it is important to monitor the formation and decay of each intermediate to understand the protein function. Fig. 5 shows the flash-induced difference spectra of RxR-DDM (Fig. 5, A and B), RxR-PC (Fig. 5, C and D), and RxR-SMA (Fig. 5, E and F) (pH 8). Flash-induced bleaching and recovery of the original pigment were observed at around 550 nm, a value similar to the absorption maximum of RxR, as shown in Fig. 3. At 405 nm, an increase and a decrease in absorbance were observed, implying the formation and decay of a blue-shifted M intermediate of RxR ( $\text{RxR}_M$ ). During the decay of  $\text{RxR}_M$ , a red-

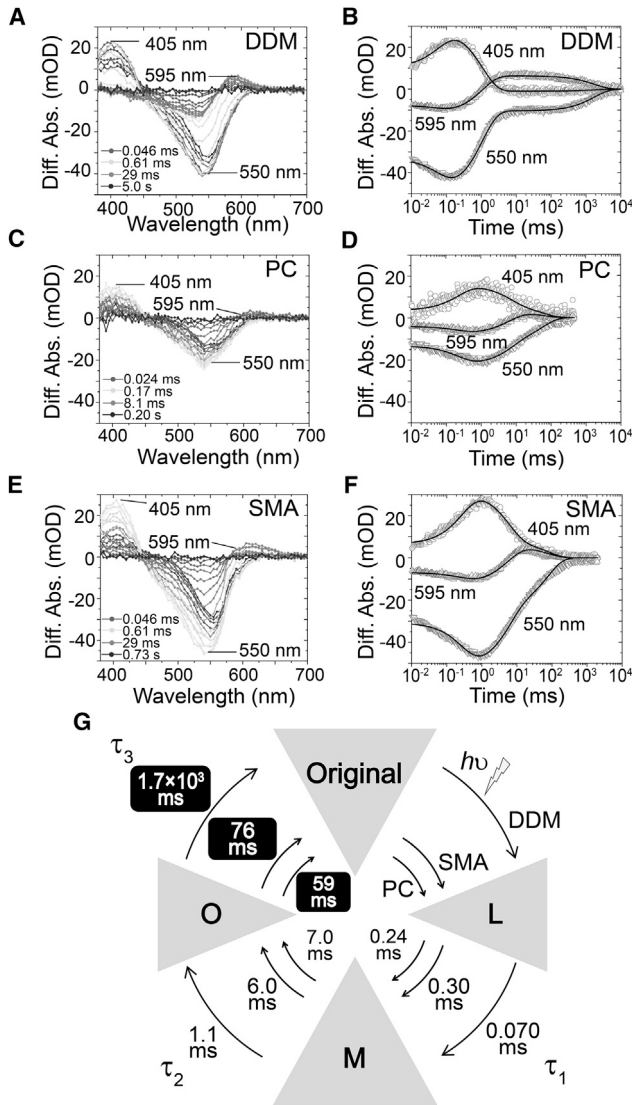

FIGURE 5 Photoreaction kinetics of RxR-DDM, RxR-PC, and RxR-SMA. (A–F) Shown are the flash-induced difference absorption spectra of RxR-DDM (A and B), RxR-PC (C and D), and RxR-SMA (E and F) at 25°C. The data were fitted using the multiexponential equation (Eq. 4, see Materials and Methods) with three time constants,  $\tau_1$ ,  $\tau_2$ , and  $\tau_3$  (solid lines in B, D, and F). (G) Given is a putative photocycle model of RxR with the cognate time constants.

shifted O intermediate of RxR was sequentially produced at around 595 nm. The time courses of the absorbance change at selected wavelengths (405 nm for RxR<sub>M</sub>, 540 nm for the unphotolyzed state, and 595 nm for O intermediate of RxR) were fitted well to the multiexponential equation (see Eq. 4) with three time constants,  $\tau_1$ ,  $\tau_2$ , and  $\tau_3$  (solid black lines in Fig. 5, B, D, and F), which can be assigned to the M formation ( $\tau_1$ ), O formation ( $\tau_2$ ), and O decay ( $\tau_3$ ), respectively. As seen in Fig. 5 G, the three time constants of RxR-SMA ( $\tau_1 = 0.30$  ms,  $\tau_2 = 6.0$  ms, and  $\tau_3 = 76$  ms) and of RxR-PC ( $\tau_1 = 0.24$  ms,  $\tau_2 = 7.0$  ms, and  $\tau_3 = 59$  ms) were almost identical, but they were dramatically different from those of

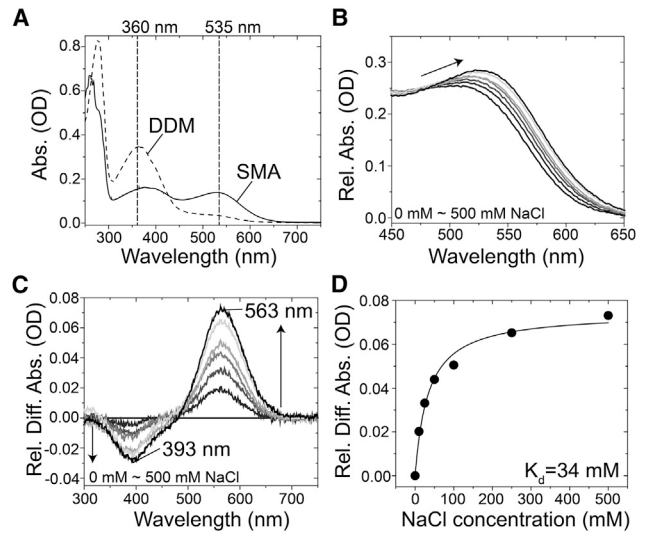

FIGURE 6 Applicability of SMA to HsSRI. (A) Shown are the absorption spectra of HsSRI-DDM (broken line) and HsSRI-SMA (solid line). (B) Shown are the changes in the absorption spectra of HsSRI-SMA by adding NaCl to the desalted buffer over a spectral range from 450 to 650 nm. The NaCl concentrations are 0, 10, 25, 50, 100, 250, and 500 mM NaCl. (C) Shown are the difference absorption spectra by adding NaCl to the desalted HsSRI-SMA sample. Each spectrum corresponds to 10, 25, 50, 100, 250, and 500 mM NaCl. (D) The absorbance changes at 563 nm were plotted against NaCl concentrations, and the dissociation constant ( $K_d$ ) value of Cl<sup>-</sup> was calculated using the Hill equation (Eq. 3, see Materials and Methods) as  $34 \pm 5.1$  mM.

RxR-DDM ( $\tau_1 = 0.070$  ms,  $\tau_2 = 1.1$  ms, and  $\tau_3 = 1.7 \times 10^3$  ms), especially  $\tau_3$ . On the basis of these results, we propose a putative model of the photochemical reaction cycle of RxR-DDM, RxR-PC, and RxR-SMA with the time constants  $\tau_1$ ,  $\tau_2$  and  $\tau_3$  (Fig. 5 G).

Finally, to further investigate the applicability of SMA for microbial rhodopsins, we employed HsSRI as a model for unstable microbial rhodopsins. As seen in Fig. S3, HsSRI can be produced in *E. coli* cells as a recombinant protein with a blue color (29,44), but its color becomes yellow ( $\lambda_{max} = \sim 360$  nm) when solubilized with the detergent DDM in low salt conditions (500 mM NaCl) because of the protein denaturation (Fig. 6 A, broken line; Fig. S3). On the other hand, when SMA was used for *E. coli* cells producing HsSRI, visible absorption at 535 nm was observed in addition to the protein denaturation signal at 360 nm (Fig. 6 A, solid line; Fig. S3) even in low salt conditions (500 mM NaCl). So far, we have identified two relatively stable sensory rhodopsin I (SRI) proteins, SRI from the eubacterium *Salinibacter ruber* (SrSRI) and SRI from the halophilic archaeon *Haloarcula vallismortis* (29). Using those proteins, we reported chloride binding to SrSRI with an affinity of 307 mM (41). The visible absorption of HsSRI in SMALPs (HsSRI-SMA) was kept more than 1 h even in the absence of NaCl, and its high stability allowed us to investigate the chloride binding to HsSRI-SMA. As seen for SrSRI and SRI from the halophilic archaeon *H. vallismortis*, an



NaCl-induced spectral red shift from 521 to 535.5 nm was observed for *HsSRI-SMA* (Fig. 6 B). The difference spectra showed increases and decreases in absorbance at 563 and 393 nm, respectively, with an isosbestic point at around 485 nm (Fig. 6 C) indicating an equilibrium between the chloride-bound and -unbound forms of *HsSRI-SMA*. The absorbance changes at 563 nm were plotted against the NaCl concentration (Fig. 6 D) and the dissociation constant ( $K_d$ ) estimated using the Hill equation (see, Eq. 3) was  $34 \pm 5.1$  mM.

## DISCUSSION

### Schematics of RxR-SMA

On the basis of our results and the previous report in which the styrene groups of the polymer were shown to interact with the lipid acyl chains (45), we propose that RxR-SMA formed single-, double-, and triple-layered discoidal particles with diameters of 30 nm shown schematically in Fig. 7 A. Many previous studies indicated that SMALPs formed discoidal particles with diameters of  $\sim 10$  nm (20,23,27), which is significantly smaller than that of RxR-SMA observed here. We speculate that the cause of such the large difference in particle sizes may have come from several differences in experimental procedures to prepare the SMALPs between this study and the previous studies. Firstly, we solubilized cellular membrane lipids with 5 w/v % SMA, which was higher than the concentration (i.e., 2.5 w/v %) reported in the previous studies (20,23,27). Secondly, we solubilized cellular membrane lipids by SMA without adding exogenous lipids, whereas the exogenous lipids (e.g., dimyristoyl PC) were added during the solubilization process in the previous studies (20,23). Thus, the ratio of SMA to lipids was higher in this study than those in the previous studies. Because it has been reported that the diameters of the SMALPs were increased according to the higher ratio of SMA to lipids (46), we speculate that the higher ratio of SMA to lipids led to the formation of the extremely large SMALPs observed in this study. On the other hand, it may be possible that the stacked multilayers of RxR-SMA influence the properties of the rhodopsins while we analyzed them using the samples consisting of single-, double-, and triple-layered particles with populations of 40, 20 and 40%, respectively, in this study (Fig. 7 A). It is assumed that the single-, double-, and triple-layered states form the equilibrium in the SMALPs samples. To elucidate the effect of the stacked multilayers, it will be necessary to shift the equilibrium to each state by changing several experimental conditions, such as temperature, pH, pressure ionic composition, and ionic strength, and then quantitatively analyze the properties (e.g., photocycle and estimation of  $pK_a$  of the Schiff base) of each state as future works. Besides, the results of AFM measurements could not completely deny the possibilities that

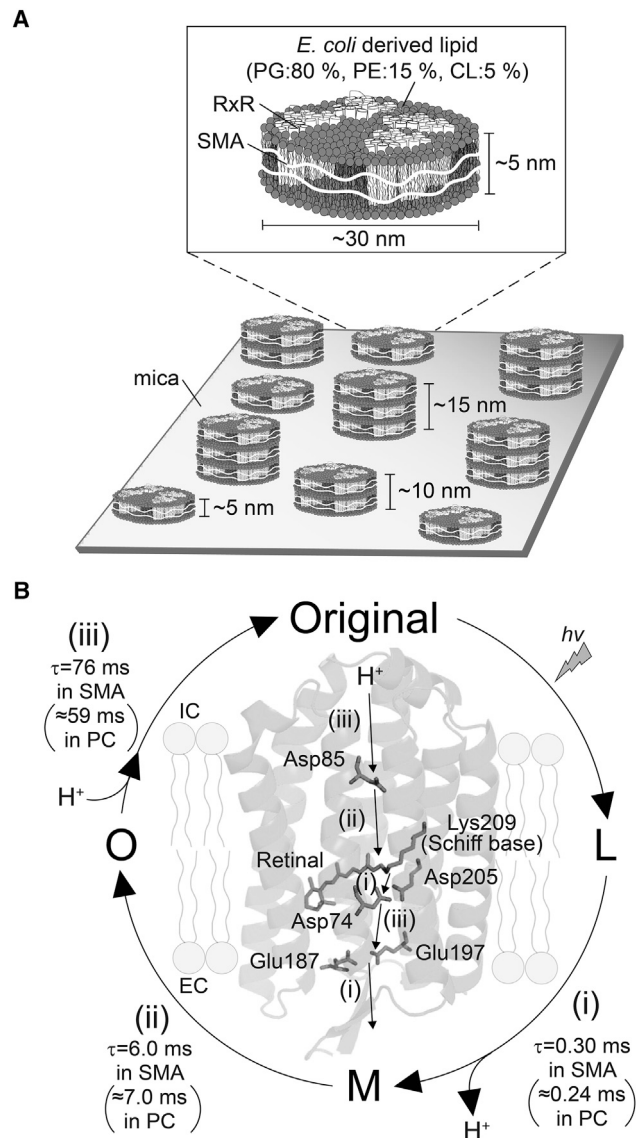

FIGURE 7 Schematic structure of RxR-SMA and proton transport mechanism in RxR-SMA. (A) Shown are the schematics of RxR-SMA. The RxR-SMA samples consisted of single-, double-, and triple-layered particles having diameters of several tens of nanometers with the heights of  $\sim 5$ , 10, and 15 nm, respectively. A single particle contains 4.1 RxR trimers (i.e., 12.3 RxR monomers) on average, with intrinsic lipids from *E. coli* cells. The native *E. coli* membrane consists of PG, PE, and CL (phosphatidylglycerol, phosphatidylethanolamine, and cardiolipin, respectively). (B) Shown is the proton transport mechanism in RxR-SMA during the photocycle. The proton transport pathway and key carboxylates are indicated on the crystal structure of RxR (PDB: 6KFQ (42)). A proton is transported from the intracellular side (IC) to extracellular side (EC) through several carboxylates during the photocycle.

the SMALPs samples form swollen single lipid bilayers (e.g., the phospholipid headgroups of the lower leaflet are not in immediate contact with the solid support and that the protein protrudes from at least one side of the nanodiscs), complex aggregates, or copolymer micelles rather than the multiple-layered structure. It will be necessary to



observe the detailed morphology of the SMALPs by electron microscopy in the future.

### Advantages of SMA in comparison with DDM and PC

Membrane-embedded proteins are often extracted and purified from lipid membranes using detergents to investigate their structures and functions. When necessary, the purified proteins are reconstituted into phospholipids such as PC and PG (13–15,47,48). Instead of detergents and lipids, in this study, we successfully used SMA as a molecule forming a membrane-mimicking assembly to characterize two microbial rhodopsins, RxR and *HsSRI*. Here, we discuss the applicability of SMA for RxR and *HsSRI* and compare that with DDM and PC.

#### From the viewpoint of RxR

The physicochemical and photochemical properties of RxR-SMA are listed in Table 1 and are compared with RxR-DDM (in detergent) and RxR-PC (in lipids). So far, the applicability of SMA has been reported for several membrane proteins, such as ABC transporters and KcsA (22,23), but its comparison with micelles and liposomes at the molecular level has not been reported. As seen in Figs. 2 and 3 and Table 1, the absorption maximum and retinal configuration of RxR-SMA (540 nm and 99.0%, respectively) are almost identical to those of RxR-DDM and RxR-PC, indicating that the overall protein and retinal structures are roughly identical among them. Thus, these three membrane mimic molecules (i.e., SMA, DDM, and PC) are generally suitable for investigating the structure and function of RxR. On the other hand, the DLS analysis revealed that the size of RxR-PC particles ( $5.4 \times 10^2 \pm 23$  nm) matched well with the visible wavelength region (400–800 nm), suggesting that scattering would be observed for the visible spectroscopy of RxR-PC. In fact, RxR-PC showed a largely scattered spectrum, whereas RxR-SMA showed a scattering-less spectrum as well as RxR-DDM (Fig. 3). Thus, RxR-SMA is more suitable for spectroscopic analysis compared with RxR-PC. The pH titration experiments for RxR-DDM revealed that the  $pK_a$  of the protonated Schiff base nitrogen (Lys209), which is a crucial residue for all rhodopsins because of its linkage with the retinal chromophore, was slightly (1.3–1.8 unit) smaller than the others (RxR-PC and RxR-SMA). RxR-DDM is surrounded by the detergent DDM in solution, whereas the others (RxR-PC and RxR-SMA) are surrounded by lipids (Fig. 1). Therefore, differences in the  $pK_a$  of the Schiff base can be explained by differences in the interactions between RxR and surrounding molecules. Thus, these results suggest that two membrane mimics, SMA and PC, are more suitable for investigating the function and structure of RxR than is DDM. This feature is also shown in the reaction kinetics of RxR upon illumination. Time-resolved flash photolysis

revealed that the reaction kinetics for RxR-SMA are similar to those of RxR-PC but are quite different from those of RxR-DDM (Fig. 5; Table 1). The mutational and theoretical analysis of RxR in our previous study revealed its proton transport steps as follows (Fig. 7 B): 1) a proton of the Schiff base (Lys209) is transferred to the counterion Asp74 during the transition from the L to M intermediate, and simultaneously, a respective proton is released from the proton releasing group (Glu187/Glu197) to the extracellular side, 2) a proton of Asp85 is transferred to the Schiff base during the transition from the M to O intermediate, and 3) a proton is taken up from the intracellular side to Asp85 during the transition from O intermediate to original state (26). All three time constants (i.e.,  $\tau_1$ ,  $\tau_2$ , and  $\tau_3$ ) reflect the rates of the cognate proton transport steps and are physiologically important in the proton pumping function of RxR. The similarity of the reaction kinetics for RxR-SMA and RxR-PC suggests that RxR-SMA shows the equivalent proton pumping function with RxR-PC. Similar to the  $pK_a$  of the Schiff base, the differences in rate constants between RxR-SMA, RxR-PC, and RxR-DDM can be explained by differences in the interactions between RxR and surrounding molecules. Microbial rhodopsins including RxR show cognate biological functions during the photocycle, indicating their biological importance. In outward proton pumps, including *H. salinarum* bacteriorhodopsin and RxR, one proton moves from the intracellular side to the extracellular side during a single photocycle, and therefore, the photocycling rate is tightly coupled with their proton pumping function. In this study, the photocycling rate of RxR-DDM was ~30-fold smaller than RxR-SMA and RxR-PC, indicating its significantly lower proton pumping activity. Thus, these results suggest that two membrane mimics, SMALPs and PC liposome, are more suitable for investigating the function and structure of RxR compared with the detergent DDM. In contrast, a previous study reported that *NpSRII* showed 10-fold faster M decay in SMALPs (diameter: ~10 nm) as compared with that in liposomes and MSP nanodiscs (32). The reason for the difference was proposed to be that the high local proton concentration around *NpSRII* in SMALPs is formed by the negative charge of carboxylic groups of SMA and affects the rate of M decay. We speculate that the larger distance between carboxylic groups of SMA and RxR due to the larger SMALPs (diameter: ~30 nm) in this study prevents the high local proton concentration around RxR and effects on the rate of the photocycle. Thus, the large SMALPs allows us to reconstitute microbial rhodopsins into lipids without the undesired charge effects SMA.

These comparisons of spectroscopic properties revealed that RxR-SMA has advantages compared with RxR-DDM (i.e., small scattering) and RxR-PC (i.e., high  $pK_a$  of the Schiff base and fast photocycle). Therefore, SMA will be a useful tool to study microbial rhodopsins instead of detergents such as DDM and lipids such as PC.

### From the viewpoint of HsSRI

The applicability of using SMA for microbial rhodopsins was also revealed for HsSRI. For membrane-embedded proteins, reconstitution of the purified proteins into lipids such as PC is effective for their functional and structural studies because they work in the lipid bilayer in living organisms. On the other hand, membrane proteins are often denatured during purification with detergents because of their instability in micelles. To avoid denaturation, membrane proteins are produced in cell-free systems in which they are synthesized in lipids and simultaneously reconstituted into them (49). In addition, some membrane proteins from halophilic organisms are often unstable without salts (29). Because of the electrostatic interactions between salts and lipids, it is quite difficult to reconstitute membrane proteins into lipids in high salt conditions. Historically, microbial rhodopsins were first discovered from hypersaline environments; therefore, some of them are unstable in low salt conditions ( $\leq 500$  mM NaCl). As reported so far, HsSRI can be successfully produced both in the archaeon *H. salinarum* (27) and in the eubacterium *E. coli* cells (29) with blue color. Fortunately, HsSRI can be purified using the detergent DDM in the presence of high salt conditions ( $>4$  M NaCl) without loss of its color (29,44). However, its instability in low salt conditions hampers its reconstitution into lipids. In fact, HsSRI rapidly lost its visible color when DDM-solubilized HsSRI samples were suspended in a solution containing 500 mM NaCl (Fig. 6 A, broken line; Fig. S3). On the other hand, using SMA, HsSRI can be extracted and reconstituted into cellular membrane lipids and retains its visible color (Fig. 6 A, solid line; Fig. S3). It has been reported that SMALPs contain a central lipid bilayer supported by an outer annulus of SMA polymer in which the structure is stabilized by the intercalation of hydrophobic styrene groups between the acyl chains of the lipid bilayer (20). In this case, the hydrophilic maleic acid groups face the solvent. Our AFM images are consistent with that assumption (Fig. 2). Thus, the use of SMA is a universally applicable method that could extract active membrane proteins, including microbial rhodopsins, without the need for detergent.

### CONCLUSIONS

The extraction of membrane proteins from lipids and their reconstitution into lipids are important steps for understanding the functions and structures of membrane proteins. In this study, we successfully used SMA to purify two seven-transmembrane photoactive proteins, RxR and HsSRI. As a result, those microbial rhodopsins were obtained as SMALPs without the need for detergent and without changing their physicochemical properties. Thus, SMA is a universally applicable method for solubilizing and characterizing membrane proteins.

### SUPPORTING MATERIAL

Supporting Material can be found online at <https://doi.org/10.1016/j.bpj.2020.09.026>.

### AUTHOR CONTRIBUTIONS

Y.S. designed the research. T.U. and M.S. performed the research. T.H. and S.N. contributed analytic tools. T.U., K.K., M.S., and Y.S. analyzed the data. T.U., K.K., T.H., M.S., and Y.S. wrote the manuscript.

### ACKNOWLEDGMENTS

We thank Ms. Kanae Kanehara, Mr. Shinichiro Yonekura, and Dr Atsushi Shibukawa for assistance with sample preparation and DLS experiments and invaluable discussion, respectively.

This work was financially supported by JSPS KAKENHI grant numbers JP19K16090 to K.K., JP18K06156 to T.H., JP18H01836, JP19H05257 to M.S., and JP18H02411, JP19H04727, and JP19H05396 to Y.S. This research was partially supported by CREST-JST (JPMJCR1656) and AMED (18dm0207060h0002) to Y.S.

### REFERENCES

- Scaltriti, M., and J. Baselga. 2006. The epidermal growth factor receptor pathway: a model for targeted therapy. *Clin. Cancer Res.* 12:5268–5272.
- McCudden, C. R., M. D. Hains, ..., F. S. Willard. 2005. G-protein signaling: back to the future. *Cell. Mol. Life Sci.* 62:551–577.
- Ernst, O. P., D. T. Lodowski, ..., H. Kandori. 2014. Microbial and animal rhodopsins: structures, functions, and molecular mechanisms. *Chem. Rev.* 114:126–163.
- Lanyi, J. K. 2004. Bacteriorhodopsin. *Annu. Rev. Physiol.* 66:665–688.
- Kurihara, M., and Y. Sudo. 2015. Microbial rhodopsins: wide distribution, rich diversity and great potential. *Biophys. Physicobiol.* 12:121–129.
- Kojima, K., A. Shibukawa, and Y. Sudo. 2020. The unlimited potential of microbial rhodopsins as optical tools. *Biochemistry.* 59:218–229.
- Govorunova, E. G., O. A. Sineshchikov, ..., J. L. Spudich. 2017. Microbial rhodopsins: diversity, mechanisms, and optogenetic applications. *Annu. Rev. Biochem.* 86:845–872.
- Zhang, F., J. Vierock, ..., K. Deisseroth. 2011. The microbial opsin family of optogenetic tools. *Cell.* 147:1446–1457.
- Michel, H., and D. Oesterhelt. 1980. Three-dimensional crystals of membrane proteins: bacteriorhodopsin. *Proc. Natl. Acad. Sci. USA.* 77:1283–1285.
- Hohenfeld, I. P., A. A. Wegener, and M. Engelhard. 1999. Purification of histidine tagged bacteriorhodopsin, pharaonis halorhodopsin and pharaonis sensory rhodopsin II functionally expressed in *Escherichia coli*. *FEBS Lett.* 442:198–202.
- Kanehara, K., S. Yoshizawa, ..., Y. Sudo. 2017. A phylogenetically distinctive and extremely heat stable light-driven proton pump from the eubacterium *Rubrobacter xylanophilus* DSM 9941<sup>T</sup>. *Sci. Rep.* 7:44427.
- Kojima, K., Y. Imamoto, ..., Y. Shichida. 2014. Rod visual pigment optimizes active state to achieve efficient G protein activation as compared with cone visual pigments. *J. Biol. Chem.* 289:5061–5073.
- Miranda, M. R., A. R. Choi, ..., L. S. Brown. 2009. The photocycle and proton translocation pathway in a cyanobacterial ion-pumping rhodopsin. *Biophys. J.* 96:1471–1481.

14. Shionoya, T., M. Mizuno, ..., Y. Mizutani. 2018. High thermal stability of oligomeric assemblies of thermophilic rhodopsin in a lipid environment. *J. Phys. Chem. B.* 122:6945–6953.
15. Sudo, Y., A. Okada, ..., M. Homma. 2009. Characterization of a signaling complex composed of sensory rhodopsin I and its cognate transducer protein from the eubacterium *Salinibacter ruber*. *Biochemistry*. 48:10136–10145.
16. Yagasaki, J., D. Suzuki, ..., Y. Sudo. 2010. Spectroscopic studies of a sensory rhodopsin I homologue from the archaeon *Haloarcula vallismortis*. *Biochemistry*. 49:1183–1190.
17. Bayburt, T. H., Y. V. Grinkova, and S. G. Sligar. 2006. Assembly of single bacteriorhodopsin trimers in bilayer nanodiscs. *Arch. Biochem. Biophys.* 450:215–222.
18. Wang, J., J. Sasaki, ..., J. L. Spudich. 2012. HAMP domain signal relay mechanism in a sensory rhodopsin-transducer complex. *J. Biol. Chem.* 287:21316–21325.
19. Dörr, J. M., S. Scheidelaar, ..., J. A. Killian. 2016. The styrene-maleic acid copolymer: a versatile tool in membrane research. *Eur. Biophys. J.* 45:3–21.
20. Knowles, T. J., R. Finka, ..., M. Overduin. 2009. Membrane proteins solubilized intact in lipid containing nanoparticles bounded by styrene maleic acid copolymer. *J. Am. Chem. Soc.* 131:7484–7485.
21. Swainsbury, D. J., S. Scheidelaar, ..., M. R. Jones. 2014. Bacterial reaction centers purified with styrene maleic acid copolymer retain native membrane functional properties and display enhanced stability. *Angew. Chem. Int.Engl.* 53:11803–11807.
22. Dörr, J. M., M. C. Koorengevel, ..., J. A. Killian. 2014. Detergent-free isolation, characterization, and functional reconstitution of a tetrameric K<sup>+</sup> channel: the power of native nanodiscs. *Proc. Natl. Acad. Sci. USA.* 111:18607–18612.
23. Gulati, S., M. Jamshad, ..., A. J. Rothnie. 2014. Detergent-free purification of ABC (ATP-binding-cassette) transporters. *Biochem. J.* 461:269–278.
24. Logez, C., M. Damian, ..., J. L. Banères. 2016. Detergent-free isolation of functional G protein-coupled receptors into nanometric lipid particles. *Biochemistry*. 55:38–48.
25. Swainsbury, D. J. K., M. S. Proctor, ..., C. N. Hunter. 2018. Probing the local lipid environment of the Rhodobacter sphaeroides cytochrome bc<sub>1</sub> and Synechocystis sp. PCC 6803 cytochrome b<sub>6</sub> f complexes with styrene maleic acid. *Biochim. Biophys. Acta Bioenerg.* 1859:215–225.
26. Kojima, K., T. Ueta, ..., Y. Sudo. 2020. Vectorial proton transport mechanism of RxR, a phylogenetically distinct and thermally stable microbial rhodopsin. *Sci. Rep.* 10:282.
27. Losi, A., S. E. Braslavsky, ..., J. L. Spudich. 1999. Time-resolved absorption and photothermal measurements with sensory rhodopsin I from *Halobacterium salinarum*. *Biophys. J.* 76:2183–2191.
28. Hoff, W. D., K. H. Jung, and J. L. Spudich. 1997. Molecular mechanism of photosignaling by archaeal sensory rhodopsins. *Annu. Rev. Biophys. Biomol. Struct.* 26:223–258.
29. Kitajima-Ihara, T., Y. Furutani, ..., Y. Sudo. 2008. Salinibacter sensory rhodopsin: sensory rhodopsin I-like protein from a eubacterium. *J. Biol. Chem.* 283:23533–23541.
30. Gakhar, S., S. H. Risbud, and M. L. Longo. 2020. Structure retention of silica gel-encapsulated bacteriorhodopsin in purple membrane and in lipid nanodiscs. *Colloids Surf. B Biointerfaces.* 186:110680.
31. Bagrov, D. V., N. Voskoboinikova, ..., K. V. Shaitan. 2016. Characterization of lipid nanodiscs containing sensory rhodopsin II and its cognate transducer from *Natronomonas pharaonis*. *Biophys.* 61:942–949.
32. Mosslehy, W., N. Voskoboinikova, ..., H. J. Steinhoff. 2019. Conformational dynamics of sensory rhodopsin II in nanolipoprotein and styrene-maleic acid lipid particles. *Photochem. Photobiol.* 95:1195–1204.
33. Ganapathy, S., L. Opdam, ..., W. J. de Grip. 2020. Membrane matters: the impact of a nanodisc-bilayer or a detergent microenvironment on the properties of two eubacterial rhodopsins. *Biochim. Biophys. Acta Biomembr.* 1862:183113.
34. Lee, S. C., T. J. Knowles, ..., T. R. Dafforn. 2016. A method for detergent-free isolation of membrane proteins in their local lipid environment. *Nat. Protoc.* 11:1149–1162.
35. Orwick-Rydmark, M., J. E. Lovett, ..., A. Watts. 2012. Detergent-free incorporation of a seven-transmembrane receptor protein into nanodisc bilayer Lipodisc particles for functional and biophysical studies. *Nano Lett.* 12:4687–4692.
36. Broecker, J., B. T. Eger, and O. P. Ernst. 2017. Crystallogenesis of membrane proteins mediated by polymer-bounded lipid nanodiscs. *Structure*. 25:384–392.
37. Shibata, M., H. Yamashita, ..., T. Ando. 2010. High-speed atomic force microscopy shows dynamic molecular processes in photoactivated bacteriorhodopsin. *Nat. Nanotechnol.* 5:208–212.
38. Shibata, M., K. Inoue, ..., T. Uchihashi. 2018. Oligomeric states of microbial rhodopsins determined by high-speed atomic force microscopy and circular dichroic spectroscopy. *Sci. Rep.* 8:8262.
39. Inoue, S., S. Yoshizawa, ..., Y. Sudo. 2018. Spectroscopic characteristics of Rubricoccus marinus xenorhodopsin (RmXeR) and a putative model for its inward H<sup>+</sup> transport mechanism. *Phys. Chem. Chem. Phys.* 20:3172–3183.
40. Chan, S. K., H. Kawaguchi, ..., T. Kouyama. 2016. Crystal structure of the 11-cis isomer of pharaonis halorhodopsin: structural constraints on interconversions among different isomeric states. *Biochemistry*. 55:4092–4104.
41. Suzuki, D., Y. Furutani, ..., Y. Sudo. 2009. Effects of chloride ion binding on the photochemical properties of salinibacter sensory rhodopsin I. *J. Mol. Biol.* 392:48–62.
42. Hayashi, T., S. Yasuda, ..., M. Kinoshita. 2020. How does a microbial rhodopsin RxR realize its exceptionally high thermostability with the proton-pumping function being retained? *J. Phys. Chem. B.* 124:990–1000.
43. Katayama, K., S. Sekharan, and Y. Sudo. 2015. Color tuning in retinylidene proteins. In *Optogenetics: Light-Sensing Proteins and Their Applications*. H. Yawo, H. Kandori, and A. Koizumi, eds. Springer Japan, pp. 89–107.
44. Sudo, Y., M. Yamabi, ..., N. Kamo. 2006. Importance of specific hydrogen bonds of archaeal rhodopsins for the binding to the transducer protein. *J. Mol. Biol.* 357:1274–1282.
45. Jamshad, M., V. Grimard, ..., T. R. Dafforn. 2015. Structural analysis of a nanoparticle containing a lipid bilayer used for detergent-free extraction of membrane proteins. *Nano Res.* 8:774–789.
46. Esmaili, M., and M. Overduin. 2018. Membrane biology visualized in nanometer-sized discs formed by styrene maleic acid polymers. *Biochim. Biophys. Acta Biomembr.* 1860:257–263.
47. Rigaud, J. L., and D. Lévy. 2003. Reconstitution of membrane proteins into liposomes. *Methods Enzymol.* 372:65–86.
48. Oiki, S. 2015. Channel function reconstitution and re-animation: a single-channel strategy in the postcrystal age. *J. Physiol.* 593:2553–2573.
49. Sachse, R., S. K. Dondapati, ..., S. Kubick. 2014. Membrane protein synthesis in cell-free systems: from bio-mimetic systems to bio-membranes. *FEBS Lett.* 588:2774–2781.



**Biophysical Journal, Volume 119**

**Supplemental Information**

**Applicability of Styrene-Maleic Acid Copolymer for Two Microbial Rhodopsins, RxR and *HsSRI***

**Tetsuya Ueta, Keiichi Kojima, Tomoya Hino, Mikihiro Shibata, Shingo Nagano, and Yuki Sudo**

**Supplementary Fig. S1**

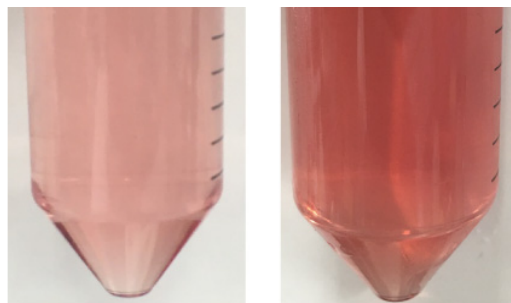

**2.5 w/v % SMA    5 w/v % SMA**

**Solubilization of *E. coli* cell membranes producing RxR with 2.5 w/v % and 5 w/v % SMA**  
Supernatant and precipitation after the ultracentrifugation of the suspension of the membranes solubilized with 2.5 w/v % SMA (left panel) or 5 w/v % SMA (right panel).

Supplementary Fig. S2

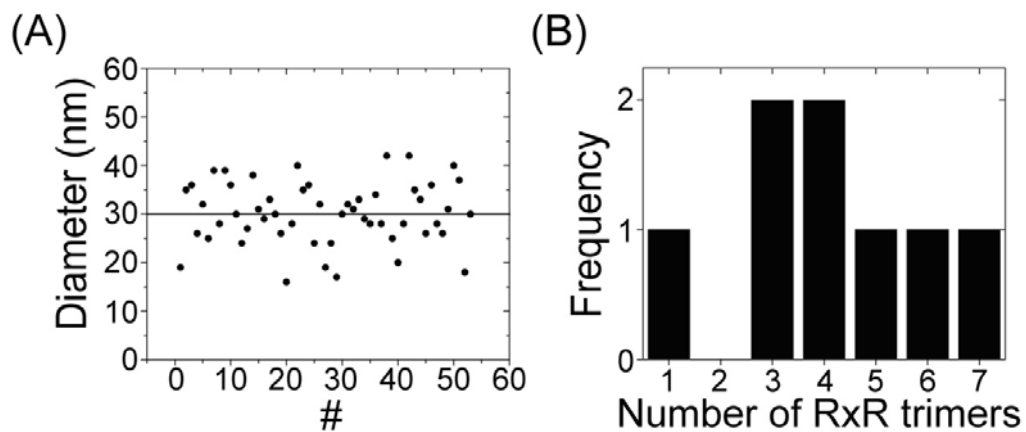

**Estimation of the diameters of each RxR-SMA particle and the number of RxR trimers per particle**

(A) Diameters of each RxR-SMA particle estimated from the AFM images ( $n = 53$ ). (B) Frequency of the number of RxR trimers per particle estimated from the AFM images ( $n = 8$ ).



**Supplementary Fig. S3**

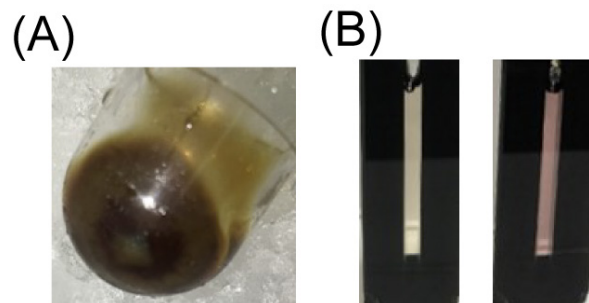

**Extraction of *HsSRI* from *E. coli* membranes by DDM and by SMA**

(A) *E. coli* cell membranes producing *HsSRI*. (B) Sample cuvettes of extracted *HsSRI* using DDM (*HsSRI*-DDM) (left panel) and SMA (*HsSRI*-SMA) (right panel) in buffer (500 mM NaCl, 50 mM Tris-HCl (pH 8.5), 10 v/v % glycerol).

**Supplementary movie S1**

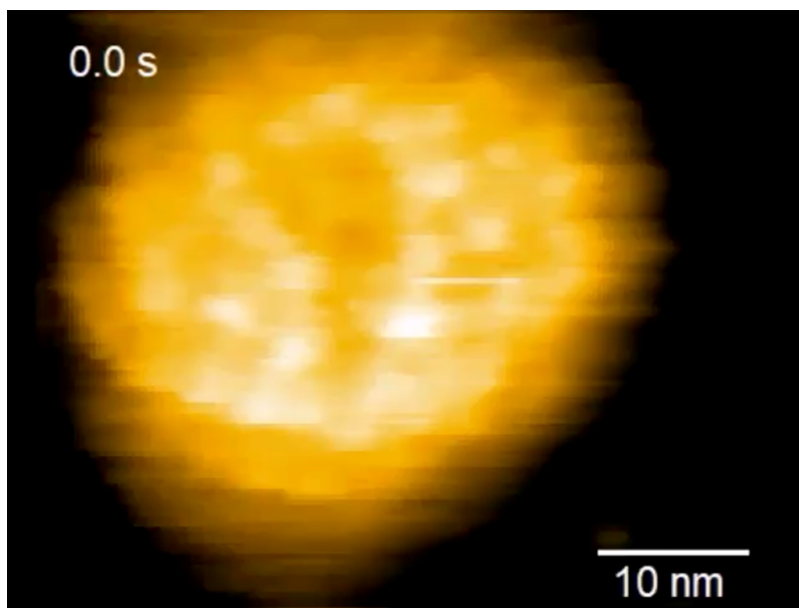

**A representative HS-AFM movie of RxR-SMA**

HS-AFM movie of RxR-SMA on the mica surface with 3.3 fps.
